# Supplementary material for: A global ocean atlas of eukaryotic genes
Source: PubMed Central journal article supplement (PMC5785536; doi:10.1038/s41467-017-02342-1), 2018-01-25
Supplement: 41467_2017_2342_MOESM2_ESM.pdf [file 41467_2017_2342_MOESM2_ESM.pdf]

## **Description of Additional Supplementary Files**

File Name: Supplementary Data 1

Description: Estimation of the total number of unigenes in samples used to construct the Tara Oceans eukaryote gene catalogue.

File Name: Supplementary Data 2

Description: Evaluation of the redundancy of the Tara Oceans eukaryote gene catalogue.

File Name: Supplementary Data 3

Description: Estimated number of different transcriptomes covered by the catalogue.

File Name: Supplementary Data 4

Description: Estimated number of genes per transcriptome.

File Name: Supplementary Data 5

Description: Sampling and Parameters

File Name: Supplementary Data 6

Description: Tara Oceans metatranscriptomic reads assembly

File Name: Supplementary Data 7

Description: Associated Pfams. List of Pfam groups (1st column) that have been detected on the same unigenes in more than 30% of cases (last column).

File Name: Supplementary Data 8

Description: BWA mapping results of Metagenomics and Metatranscriptomics reads on the gene catalog.
